# Supplementary material
Source: PubMed Central journal article supplement (PMC2949403)
Supplement: supp_182_6_784__1.pdf [file supp_182_6_784__1.pdf]

**Survival after Bronchiolitis Obliterans Syndrome among Bilateral Lung Transplant  
Recipients**

C.Ashley Finlen Copeland<sup>1</sup>, Laurie D. Snyder<sup>1</sup>, David W. Zaas<sup>1</sup>, W. Jackson Turbyfill<sup>1</sup>,  
W. Austin Davis<sup>1</sup>, and Scott M. Palmer<sup>1</sup>

**Online Supplement**

### *Supplemental Materials*

*Detailed Description of Cox Models:* Cox proportional hazards models permit analysis of time-independent and time-dependent predictors in subjects with variable follow-up assigned either a failure time or censor date if the event of interest has not occurred by the last known follow-up. Time-independent covariates are fixed at the start of follow-up (e.g. demographic characteristics). In contrast, time-dependent covariates status changes over follow-up (e.g. development of post transplant CMV infection). Time-dependent variables require special treatment in an extended Cox model. Time-dependent variables are created within the “PROC PHREG” SAS programming code such the variable’s status is recalculated at every follow-up interval and permitted to change over time as an event occurs (1).

*Effect of timing of BOS on survival after BOS:* To further understand the relationship between timing of BOS onset and survival after BOS, we considered time to the onset of BOS, as a continuous predictor in years, rather than a dichotomous variable. In this analysis, each year of earlier onset BOS was associated with a significantly increased hazard for death after the onset of BOS (p= 0.0014, HR 1.43, 95 % CI 1.15-1.66), consistent with the results obtained when time to BOS onset was dichotomized at two years after transplant.

*Relationship of Early Onset, High Grade Onset BOS, and Post BOS Treatments:* Distribution of treatments between the early and late onset groups or the high grade onset BOS and grade 1 onset BOS groups was similar (Table E2). Further, the effects of early onset BOS or high grade onset BOS persisted when adjusted for post-BOS treatments in multivariable models (Table E3).

Table E1

Early and Late or High Grade and Grade 1 BOS onset groups underwent a similar number of pulmonary function tests after lung transplantation.

| <b>Pulmonary Function Tests/Year</b>       | <b>Early Onset</b> | <b>Late Onset</b> | <b>P-value<sup>†</sup></b> | <b>High Grade</b> | <b>Grade 1</b> | <b>P-value<sup>†</sup></b> |
|--------------------------------------------|--------------------|-------------------|----------------------------|-------------------|----------------|----------------------------|
| Post-Transplant Year 1 <sup>*</sup>        | 12 (10-16)         | 12 (11-14)        | 0.83                       | 12 (10-15)        | 12(11-14)      | 0.76                       |
| Post-Transplant Years 2 and 3 <sup>*</sup> | 9 (7-12)           | 9 (8-12)          | 0.47                       | 9 (8-12)          | 9 (7-12)       | 0.53                       |
| Post-Transplant Years 4 and 5 <sup>*</sup> | 7 (4-9)            | 8 (6-11)          | 0.14                       | 7 (3-10)          | 8 (6-11)       | 0.19                       |

\* Median number of PFTS (IQR)

† Wilcoxon Rank Sum Test

Table E2

Comparable Incidence of Post BOS Treatments among Early versus Late Onset BOS or High Grade Onset versus Grade 1 Onset BOS

| <b>RISK GROUP</b>    | <b>TREATMENTS AFTER BOS</b> |                |             |                |                         |                |              |                |
|----------------------|-----------------------------|----------------|-------------|----------------|-------------------------|----------------|--------------|----------------|
|                      | Nissen <sup>*</sup>         | P <sup>†</sup> | Alemtuzumab | P <sup>†</sup> | Anti-Thymocyte Globulin | P <sup>‡</sup> | Azithroymcin | P <sup>‡</sup> |
| Early Onset BOS      | 16% (5)                     | 0.30           | 9% (3)      | 0.75           | 28% (9)                 | 0.21           | 60% (28)     | 0.50           |
| Late Onset BOS       | 8% (5)                      |                | 14% (9)     |                | 41% (26)                |                | 53% (27)     |                |
| High Grade Onset BOS | 8% (2)                      | 1.00           | 14% (10)    | 0.51           | 36% (9)                 | 0.92           | 48% (12)     | 0.24           |
| Grade 1 Onset BOS    | 11% (8)                     |                | 8% (2)      |                | 37% (27)                |                | 61% (43)     |                |

\* % (N)

† Fisher's Exact Test

‡ Chi-Square

Table E3

Impact of Early Onset BOS or High Grade Onset BOS on Mortality after BOS Adjusted for Post BOS Treatments

| RISK GROUP           | TREATMENTS AFTER BOS |           |       |             |           |       |                         |           |       |              |           |       |
|----------------------|----------------------|-----------|-------|-------------|-----------|-------|-------------------------|-----------|-------|--------------|-----------|-------|
|                      | NISSEN               |           |       | ALEMTUZUMAB |           |       | ANTI-THYMOCYTE GLOBULIN |           |       | AZITHROMYCIN |           |       |
|                      | HR                   | 95% CI    | P     | HR          | 95% CI    | P     | HR                      | 95% CI    | P     | HR           | 95% CI    | P     |
| Early Onset BOS      | 1.80                 | 1.00-3.23 | 0.05  | 2.04        | 1.11-3.74 | 0.02  | 2.03                    | 1.12-3.70 | 0.02  | 1.98         | 1.10-3.57 | 0.02  |
| High Grade Onset BOS | 2.40                 | 1.33-4.31 | 0.004 | 2.58        | 1.41-4.73 | 0.002 | 2.38                    | 1.32-4.28 | 0.004 | 2.30         | 1.27-0.17 | 0.006 |

Table E4

Acute rejection incidence and adjusted cumulative acute rejection score, measured prior to BOS, does not differ between the Early and Late or High Grade and Grade 1 BOS onset groups.

| Acute Rejection Prior to BOS       | Early Onset   | Late Onset       | P                 | High Grade    | Grade 1       | P                 |
|------------------------------------|---------------|------------------|-------------------|---------------|---------------|-------------------|
| Any Acute Rejection                | 63% (20/32)   | 78% (49/63)      | 0.11*             | 68% (17/25)   | 74% (52/70)   | 0.55*             |
| Acute Rejection Score <sup>†</sup> | 0.27 (0-0.78) | 0.31 (0.08-0.50) | 0.96 <sup>‡</sup> | 0.27 (0-0.80) | 0.31 (0-0.50) | 0.53 <sup>‡</sup> |

\* Chi-Square

<sup>†</sup> Adjusted for the number of transbronchial biopsies (acute rejection score/# biopsies) , Median (IQR)<sup>‡</sup> Wilcoxon Rank Sum Test

References:

- E1. Allison P, 1995. *Survival Analysis Using SAS: A Practical Guide*: Cary, SAS Institute Inc.
